# Supplementary material for: Acrolein-Exposed Normal Human Lung Fibroblasts in Vitro: Cellular Senescence, Enhanced Telomere Erosion, and Degradation of Werner’s Syndrome Protein
Source: PubMed Central journal article supplement (PMC4154210; doi:10.1289/ehp.1306911), 2014-04-18
Supplement: ehp.1306911.s001.pdf [file ehp.1306911.s001.pdf]

**Supplemental Material**

**Acrolein-Exposed Normal Human Lung Fibroblasts *in Vitro*:  
Cellular Senescence, Enhanced Telomere Erosion, and Degradation  
of Werner's Syndrome Protein**

Jun-Ho Jang, Shannon Bruse, Salam Huneidi, Ronald M. Schrader, Martha M. Monick, Yong  
Lin, A. Brent Carter, Aloysius J. Klingelhutz, and Toru Nyunoya

**Figure S1**

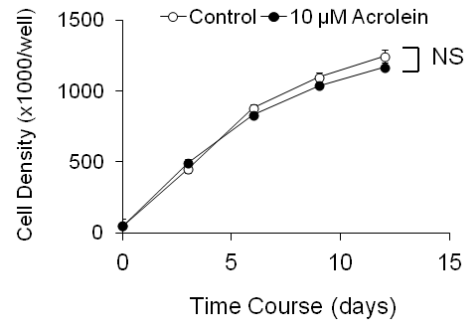

**Figure S1.** Effects of a short-term exposure to acrolein on cell growth in cultured normal human lung fibroblasts. HFL-1 cells were cultured in the absence or presence of 10  $\mu$ M acrolein for 3 d. The cells were subcultured at a starting density of 50,000/well. The cell density was monitored every 3 d for up to 12 d. Data are expressed as mean  $\pm$  SEM for three independent experiments.

**Figure S2**

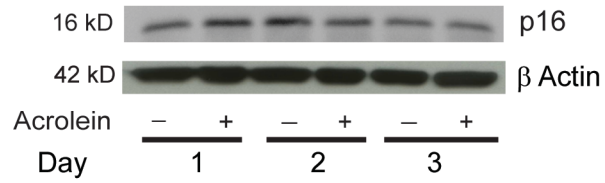

**Figure S2.** Effects of acrolein on p16 protein expression in cultured normal human lung fibroblasts. HFL-1 cells were cultured with or without 25  $\mu$ M acrolein for various periods (1, 2, and 3 d). Immunoblot analysis was performed for p16. Equal loading was determined by stripping the blot and reprobing with antibodies to  $\beta$ -actin. Immunoblotting data are representative of three experiments.
